# Supplementary material for: A non-enzymatic highly stable electrochemical sensing platform based on allylamine capped copper nanoparticles for the detection of the soil nitrate content
Source: Royal Society of Chemistry journal article supplement (doi:10.1039/d4an01345j), 2025-01-01
Supplement: d4an01345j1.pdf [file d4an01345j1.pdf]

**Supplementary information:**

**A Non-Enzymatic Highly Stable Electrochemical Sensing Platform Based on Allylamine Capped Copper Nanoparticles for the Detection of Soil Nitrate Content**

Bimalendu Mukherjee<sup>1,2</sup>, Mukti Mandal<sup>1</sup>, Raghavv Raghavender Suresh<sup>1</sup>, Shantanu Kar<sup>4</sup>, Binaya Kumar Parida<sup>4</sup>, Somsubhra Chakraborty<sup>3</sup>, and Gorachand Dutta<sup>1, \*</sup>

<sup>1</sup>NanoBiosensors and Biodevices Lab, School of Medical Sciences and Technology, Indian Institute of Technology, Kharagpur 721302, West Bengal, India

<sup>2</sup>School of Nano Science and Technology, Indian Institute of Technology, Kharagpur 721302, West Bengal, India

<sup>3</sup>Agricultural and Food Engineering Department, Indian Institute of Technology, Kharagpur 721302, West Bengal, India

<sup>4</sup>Coromandel International Limited, Coromandel House, Secunderabad, Telangana 500003, India

\*Corresponding author.

*E-mail address:* g.dutta@smst.iitkgp.ac.in

## S1. Preparation of electrodeposited copper nanoparticles (eCuNPs) and uncapped copper nanoparticles (uCuNPs)

For electrodeposition of copper, 10 mM of  $\text{CuSO}_4$  in 0.1 M  $\text{H}_2\text{SO}_4$  medium was used as the electrolytic medium. The glassy carbon electrode (GCE) was used as the working electrode which was modified with 3  $\mu\text{L}$  of Exf-CNT prior to its use for electrodeposition. Followed by 10 minutes of  $\text{N}_2$  gas purging in the  $\text{CuSO}_4$  medium, the 3 conventional electrode set up was dipped into the  $\text{N}_2$  purged 10 mL of 10 mM  $\text{CuSO}_4$  in 0.1 M  $\text{H}_2\text{SO}_4$  solution for the electrodeposition process. The chronoamperometry technique was used for 400 s with -1.0 V of initial potential input. A uniform reddish-brown coloured copper nanoparticle was observed over the surface of the electrode.

For wet chemical synthesis of uncapped copper nanoparticles,  $\text{CuSO}_4$  (2 g) was taken in a 50 ml conical flask and 20 ml of deionized water type 1 (DI type 1) was added to it at 600 rpm. Glycerine (2 ml) was added using an addition funnel and stirred for 3 minutes. Finally, hydrazine (4 ml) was added dropwise, keeping the temperature and stirring for 30 min more, then kept for 30 mins at room temperature to cool it down. After this treatment, the nanoparticles were recovered by centrifugation at 12,000 rpm and washed two times with ethanol and DI type 1 water. The supernatant was finally discarded and a residue nanoparticle was kept at hot air oven for 2 hours maintaining 60 degrees Celsius. The dried nanoparticles obtained as a black colour powder and labelled as uCuNPs.

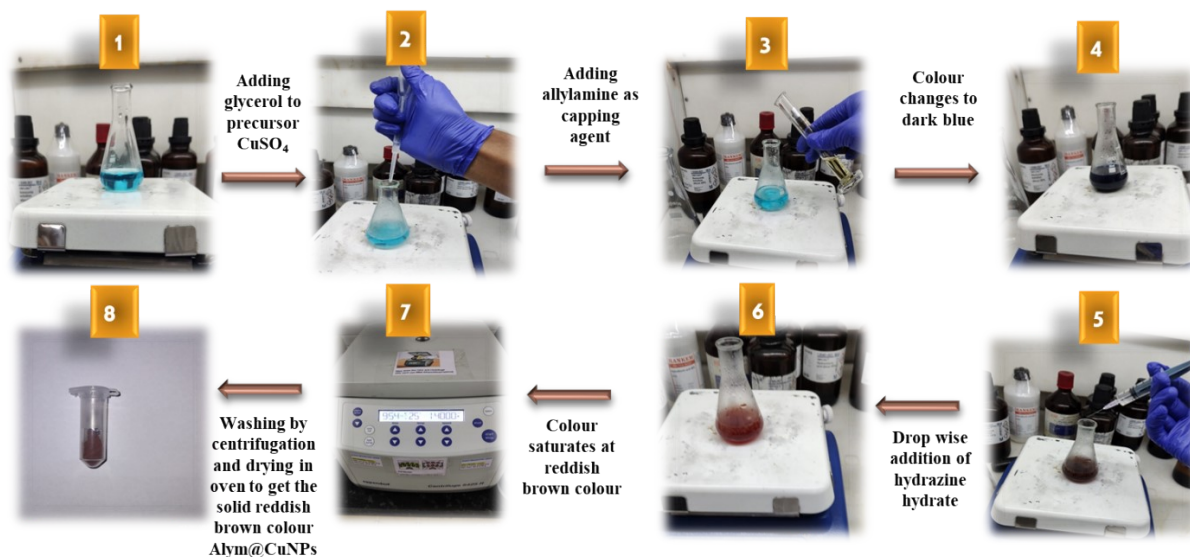

**Scheme S1.** Pictorial representation of step-wise wet chemical synthesis of allylamine capped copper nanoparticles (Alym@CuNPs) and its purification steps.

**Table S1.** Real sample analysis and % recovery calculation by comparison with Ion chromatography technique

| Soil sample name | $\text{NO}_3^-$ ion content obtained from Ion chromatography | $\text{NO}_3^-$ ion content from Ion chromatography converted to mM (Soil health: L/G/H/V) | $\text{NO}_3^-$ ion content obtained from proposed sensor data (Soil health: L/G/H/V) | % Recovery |
|------------------|--------------------------------------------------------------|--------------------------------------------------------------------------------------------|---------------------------------------------------------------------------------------|------------|
| S-6              | 509.80 ppm                                                   | 8.21 mM (H)                                                                                | 7.71 mM (H)                                                                           | 94.0%      |
| S-7              | 21.54 ppm                                                    | 1.73 mM (G)                                                                                | 1.54 mM (G)                                                                           | 92.0%      |

**Detection Mechanism :-**

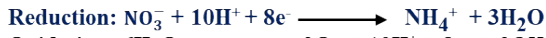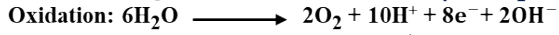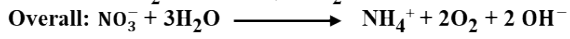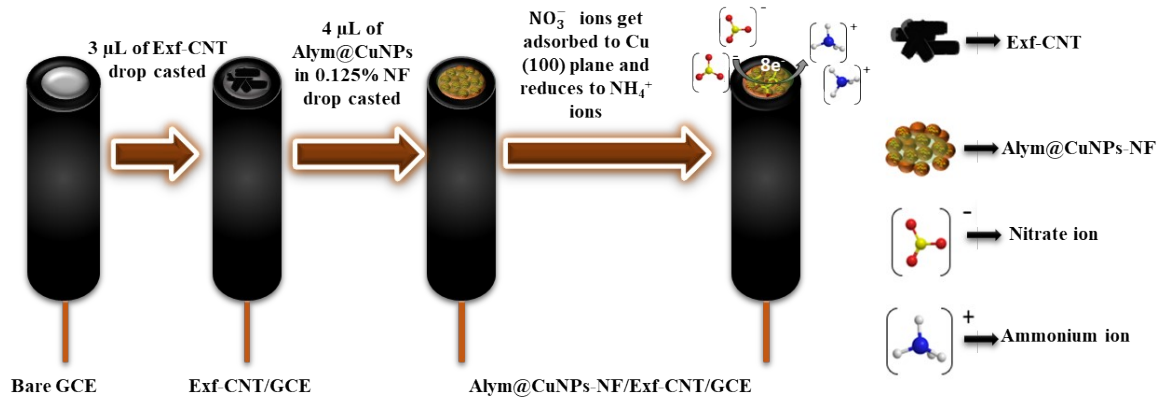

**Scheme S2.** Schematic diagram showing the fabrication of a non-enzymatic  $\text{NO}_3^-$  ion sensor using a Alym@CuNPs-NF/Exf-CNT/GCE arrangement and its detection mechanism in acidic environment (pH=2)

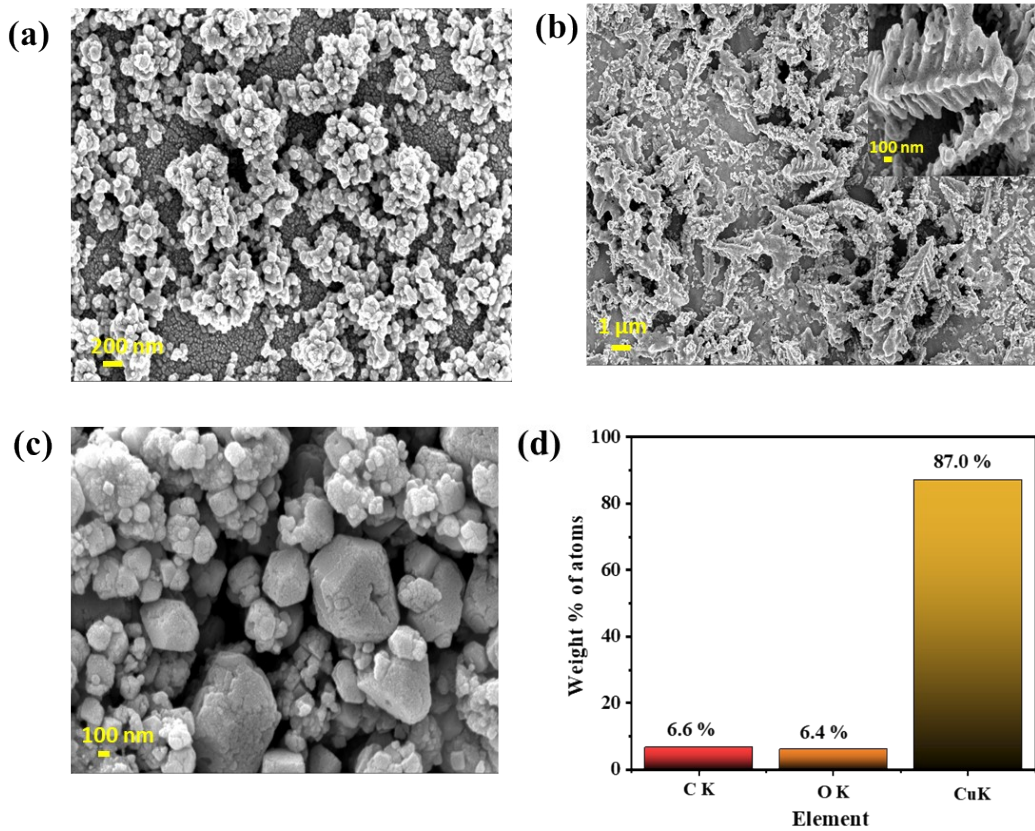

**Fig. S1.** SEM images of (a) eCuNPs/ITO (b) NF/eCuNPs/Exf-CNT/ITO (c) uCuNPs/ITO (d) Weight percentage of elements from EDAX analysis on ITO/eCuNPs

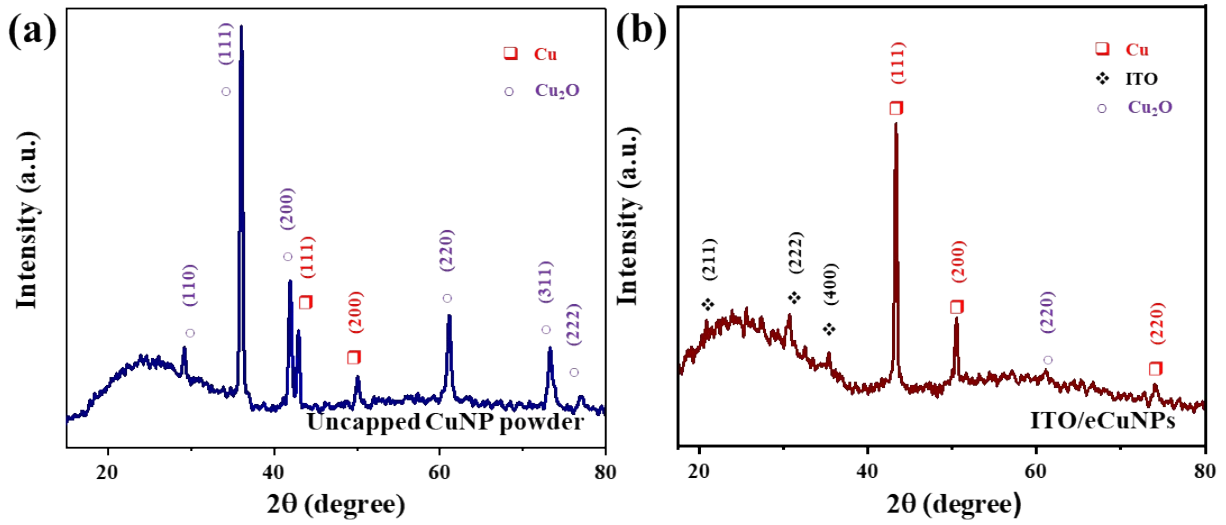

**Fig. S2.** XRD spectra of (a) uCuNPs (b) ITO/eCuNPs

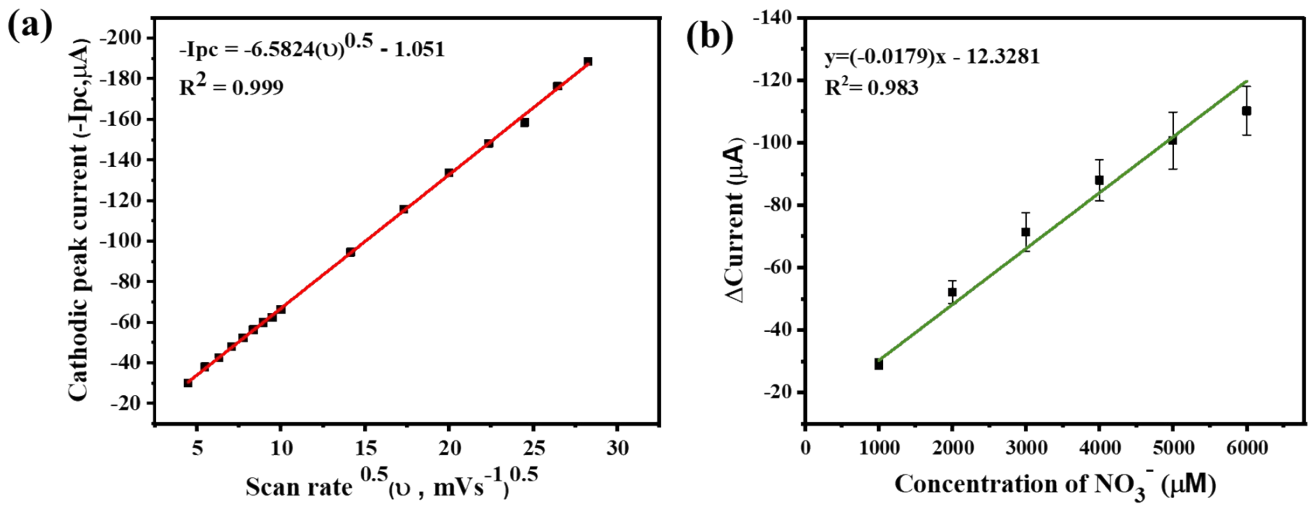

**Fig. S3.** (a) Cathodic peak current vs Scan rate<sup>0.5</sup> of 500 μM  $NO_3^-$  ion on Alym@CuNPs-NF/Exf-CNT/GCE in 0.1 M  $Na_2SO_4$  (pH=2.0) (b) Calibration plot of change in cathodic peak current vs  $NO_3^-$  ion concentration in μM (linearity in high concentration range from 1000 μM to 6000 μM in 0.1M  $Na_2SO_4$  (pH=2))

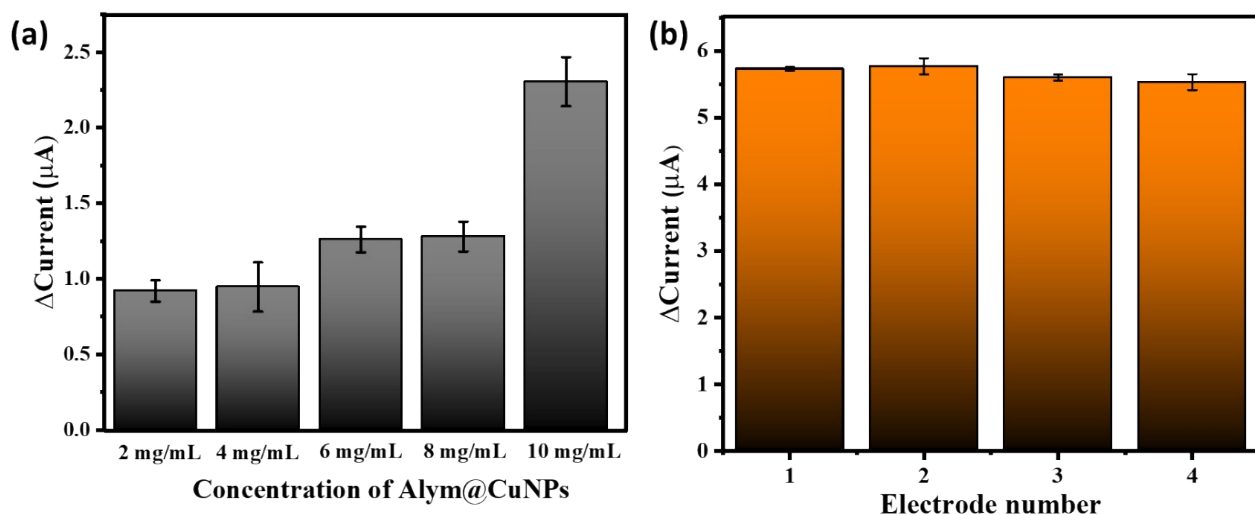

**Fig. S4.** (a) Concentration optimisation of Alym@CuNPs obtained from DPV study on Alym@CuNPs-NF/Exf-CNT/GCE in the presence of 80  $\mu\text{M}$   $\text{NO}_3^-$  ion (b) Reproducibility study obtained from DPV for Alym@CuNPs-NF/Exf-CNT/GCE in presence of 200  $\mu\text{M}$   $\text{NO}_3^-$  ion

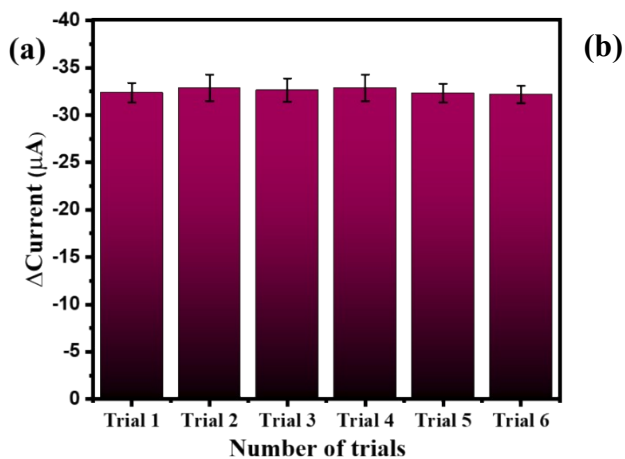

| Soil sample | 50 $\mu\text{M}$ $\text{NO}_3^-$ Spike<br>% recovery | 100 $\mu\text{M}$ $\text{NO}_3^-$ Spike<br>% recovery |
|-------------|------------------------------------------------------|-------------------------------------------------------|
| S-1         | 90.8%                                                | 87.5%                                                 |
| S-2         | 96.7%                                                | 86.3%                                                 |
| S-3         | 89.1%                                                | 88.7%                                                 |
| S-4         | 96.1%                                                | 88.4%                                                 |
| S-5         | 90.6%                                                | 86.8%                                                 |

**Fig. S5.** (a) Repeatability study obtained from DPV for Alym@CuNPs-NF/Exf-CNT/GCE electrode in presence of 1 mM  $\text{NO}_3^-$  ion (b) Spiking studies with % recovery for 50  $\mu\text{M}$  and 100  $\mu\text{M}$   $\text{NO}_3^-$  ion in 10 times diluted 1:5 extracted soil sample (overall 50 times dilution)

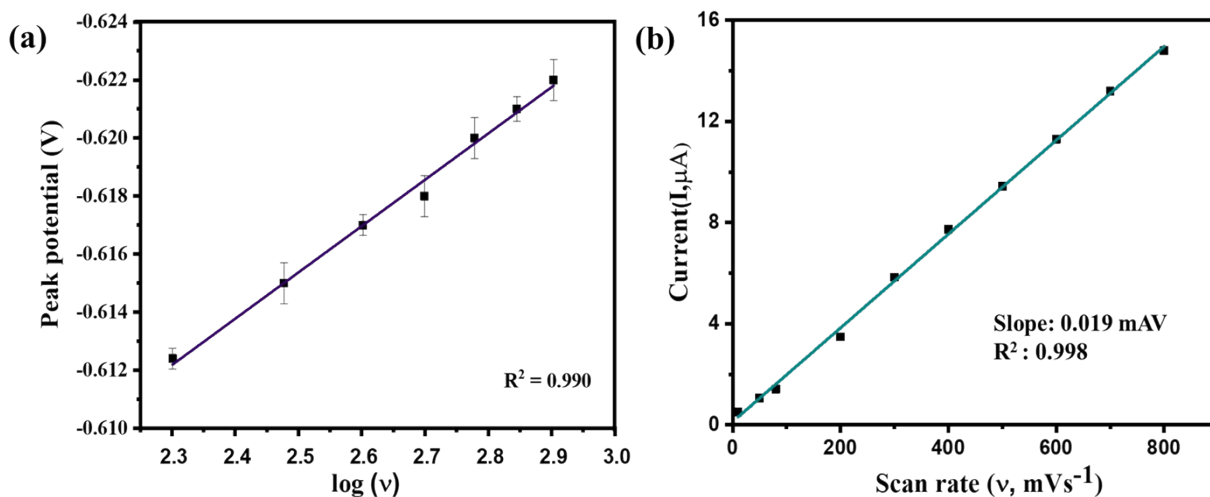

**Fig. S6.** (a) Peak potential (V) vs log (scan rate) obtained from CVs of scan rates ranging from 200 mVs<sup>-1</sup> to 800 mVs<sup>-1</sup> for 500 μM  $NO_3^-$  on Alym@CuNPs-NF/Exf-CNT/GCE (b) Current vs scan rate plot obtained from CVs of non Faradic region between -0.1 V to -0.25V on Alym@CuNPs-NF/Exf-CNT/GCE

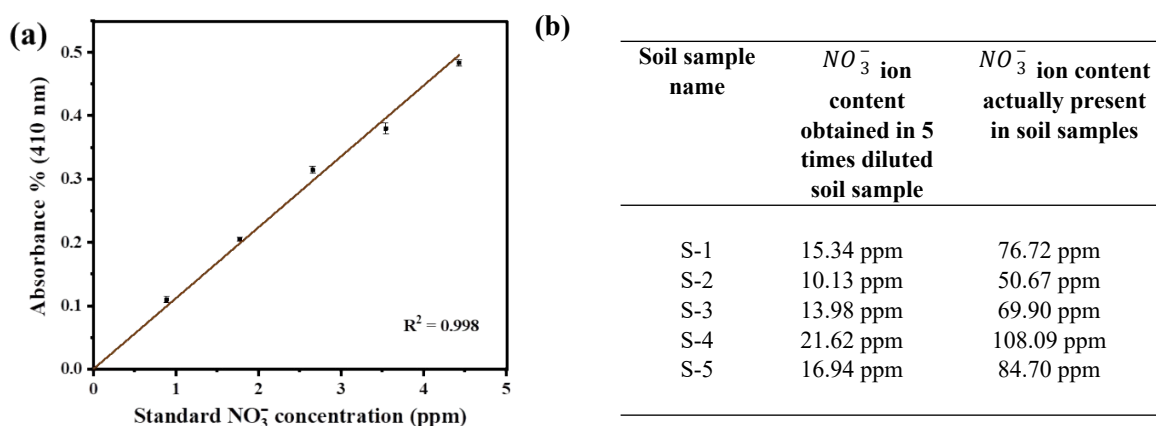

**Fig. S7.** (a) Calibration plot obtained from UV-VIS data of range of standard concentration of  $NO_3^-$  ion (b) Table representing  $NO_3^-$  ion concentration in ppm obtained from UV-VIS data for different soil samples

## S2. Electrocatalytic performance of eCuNPs and uCuNPs modified electrodes towards reduction of $NO_3^-$ ion

### S2.1 For NF/eCuNPs/Exf-CNT/GCE

Concentration studies were done on NF/eCuNPs/Exf-CNT/GCE (Fig. S8a) ; 10 μM to 1000 μM of  $NO_3^-$  ion was added gradually in the 0.1 M  $Na_2SO_4$  (pH=2) electrolytic medium and a delta current (μA) versus concentration of  $NO_3^-$  (μM) graph was plotted to obtain the calibration curve. The calibration curve was found to be linear within the range of concentrations of 10 μM to 1000 μM, with a R<sup>2</sup> value of 0.989, as depicted in Fig. S8b. The limit of detection (LOD) was calculated to be 13.2

$\mu\text{M}$  which was obtained from  $3.3 (SD_B / S)$ , where  $SD_B$  is the standard deviation of current value of three blank data (absence of  $\text{NO}_3^-$  ion) and  $S$  is the slope of the calibration curve.

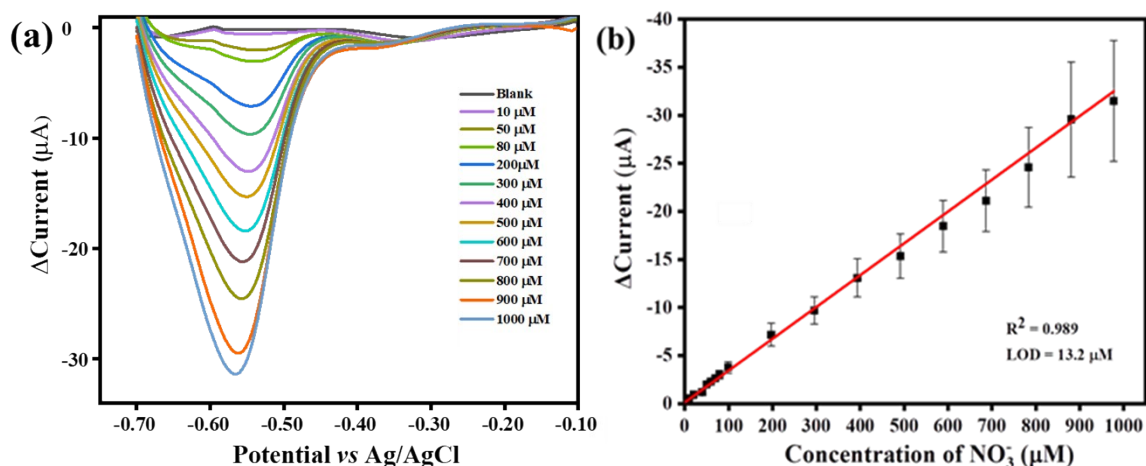

**Fig. S8.** (a) DPV study of  $\text{NO}_3^-$  ion concentration studies from  $10 \mu\text{M}$  to  $1000 \mu\text{M}$  on NF/eCuNPs/Exf-CNT/GCE in  $0.1 \text{ M Na}_2\text{SO}_4$  ( $\text{pH}=2$ ) (b) Calibration plot of change in cathodic peak current vs  $\text{NO}_3^-$  ion concentration in  $\mu\text{M}$  on NF/eCuNPs/Exf-CNT/GCE in  $0.1 \text{ M Na}_2\text{SO}_4$  ( $\text{pH}=2$ )

## S2.2 For uCuNPs-NF/Exf-CNT/GCE

$\text{NO}_3^-$  ion concentration studies were also done on uCuNPs-NF/Exf-CNT/GCE, for a range of  $50 \mu\text{M}$  to  $1000 \mu\text{M}$  concentration. But generation of multiple peaks were observed between  $-0.35 \text{ V}$  and  $-0.6 \text{ V}$  due to which it becomes quite complex to interpret the correct peak position, so further calibration studies were not done for uCuNPs modified electrode.

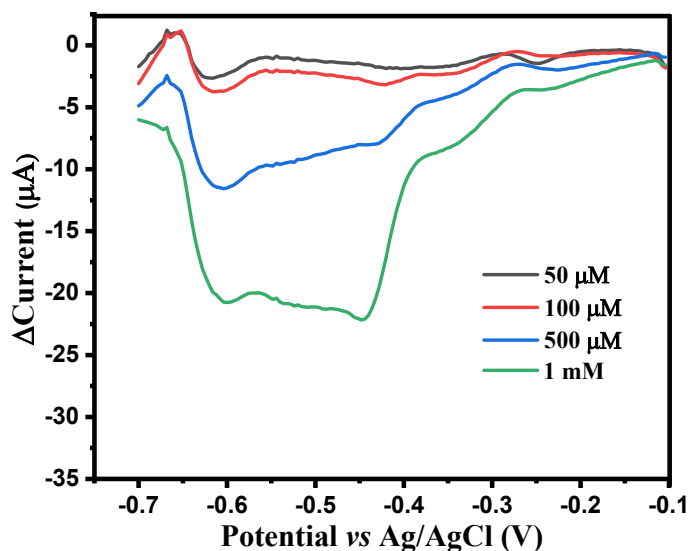

**Fig. S9.** DPV study of  $\text{NO}_3^-$  ion concentration studies from  $50 \mu\text{M}$  to  $1000 \mu\text{M}$  on uCuNPs-NF/Exf-CNT/GCE in  $0.1 \text{ M Na}_2\text{SO}_4$  ( $\text{pH}=2$ )



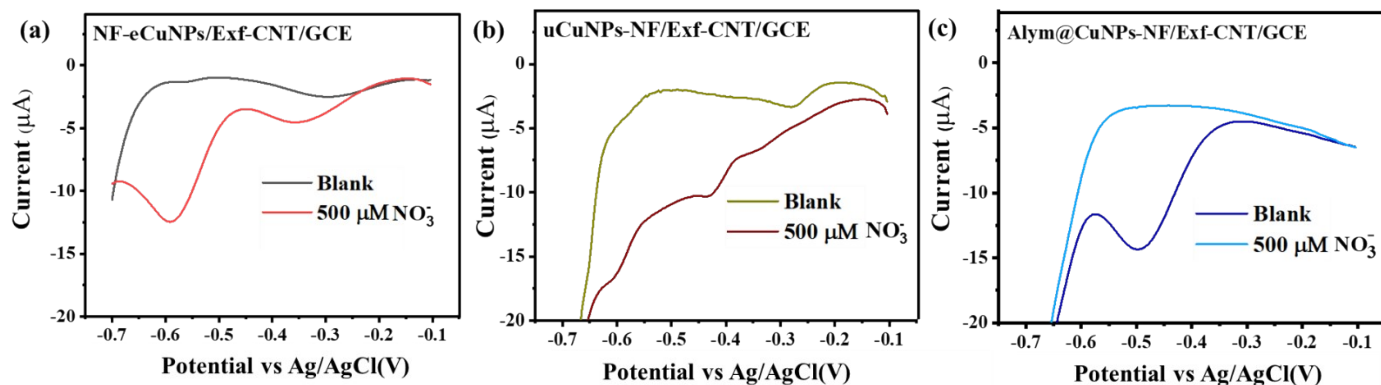

**Fig. S10.** DPV comparison study of 500  $\mu\text{M}$   $\text{NO}_3^-$  ion on three different sets of modified electrodes in 0.1 M  $\text{Na}_2\text{SO}_4$  (pH=2) ; (a) NF-eCuNPs/Exf-CNT/GCE, (b) uCuNPs-NF/Exf-CNT/GCE, (c) Alym@CuNPs-NF/Exf-CNT/GCE

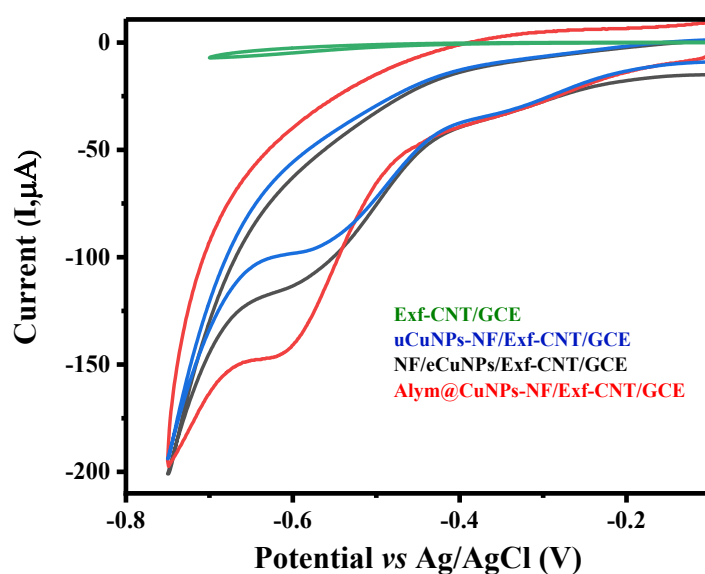

**Fig. S11.** CV comparison study of 500  $\mu\text{M}$   $\text{NO}_3^-$  ion concentration on different modified electrodes in 0.1 M  $\text{Na}_2\text{SO}_4$  (pH=2)

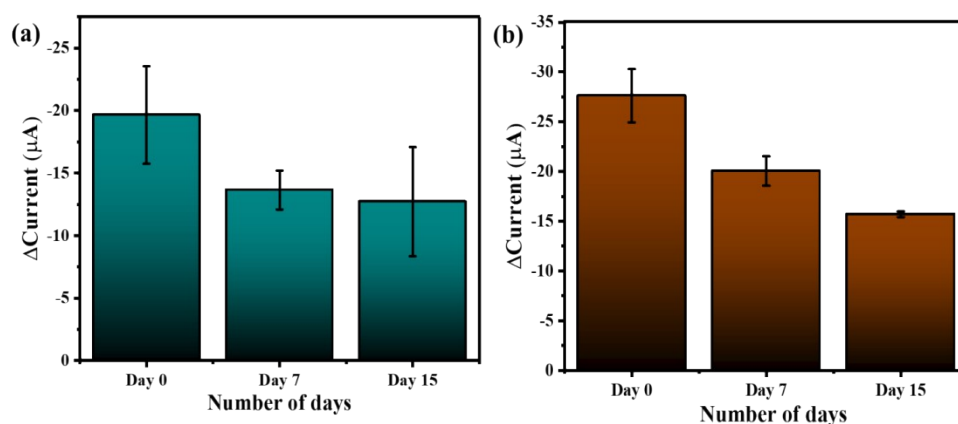

**Fig. S12.** Storage stability obtained from DPV study for (a) uCuNPs-NF/Exf-CNT/GCE (b) NF/eCuNPs/Exf-CNT/GCE in the presence of 1 mM  $\text{NO}_3^-$  ion in 0.1 M  $\text{Na}_2\text{SO}_4$  (pH=2)



### S3. Delta current response for peak current measurement of $NO_3^-$ ion reduction

Delta current response means difference in peak current of the  $NO_3^-$  ion at a concentration and blank current (absence of  $NO_3^-$  ion) at the same potential. In the absence of  $NO_3^-$  ion, the background current attributed to the blank signal can vary a bit due to the hierarchical non-uniform porous structure of Aym@CuNPs which is evident from the FESEM image in Fig.2a. In the presence of  $NO_3^-$  ion, the catalytic activity of Aym@CuNPs facilitates consistent electron transfer efficiency, resulting in a comparable increment in current response for a fixed concentration of  $NO_3^-$  ion in different modified electrodes. For further clarification, it has been shown here in Fig.S13 that two different Aym@CuNPs-NF/Exf-CNT/GCE electrodes 1 and 2 give almost same delta current response, 23.8  $\mu$ A (1) and 24.1  $\mu$ A (2) respectively for 1 mM  $NO_3^-$  ion concentration

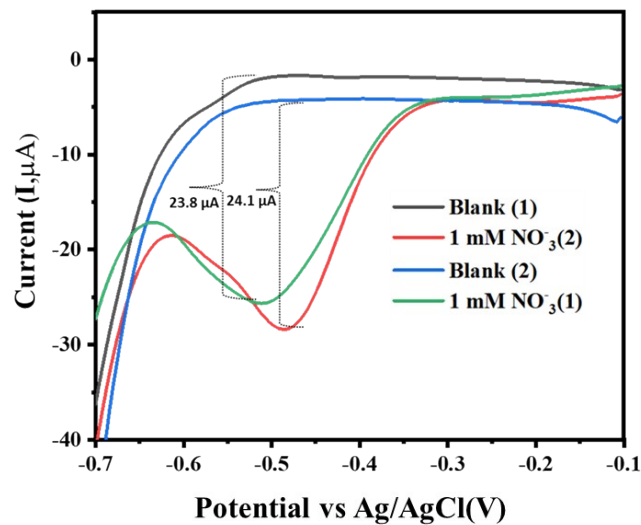

Fig. S13. DPV study for comparison of blank current response and 1 mM  $NO_3^-$  ion current response for two electrodes (1 and 2) in 0.1 M  $Na_2SO_4$  (pH=2)
